# Supplementary material
Source: MDPI journal article supplement (https://www.mdpi.com/2073-4395/14/3/621)
Supplement: s1 [file s1]

## Glyoxylate and Dicarboxylate Metabolism

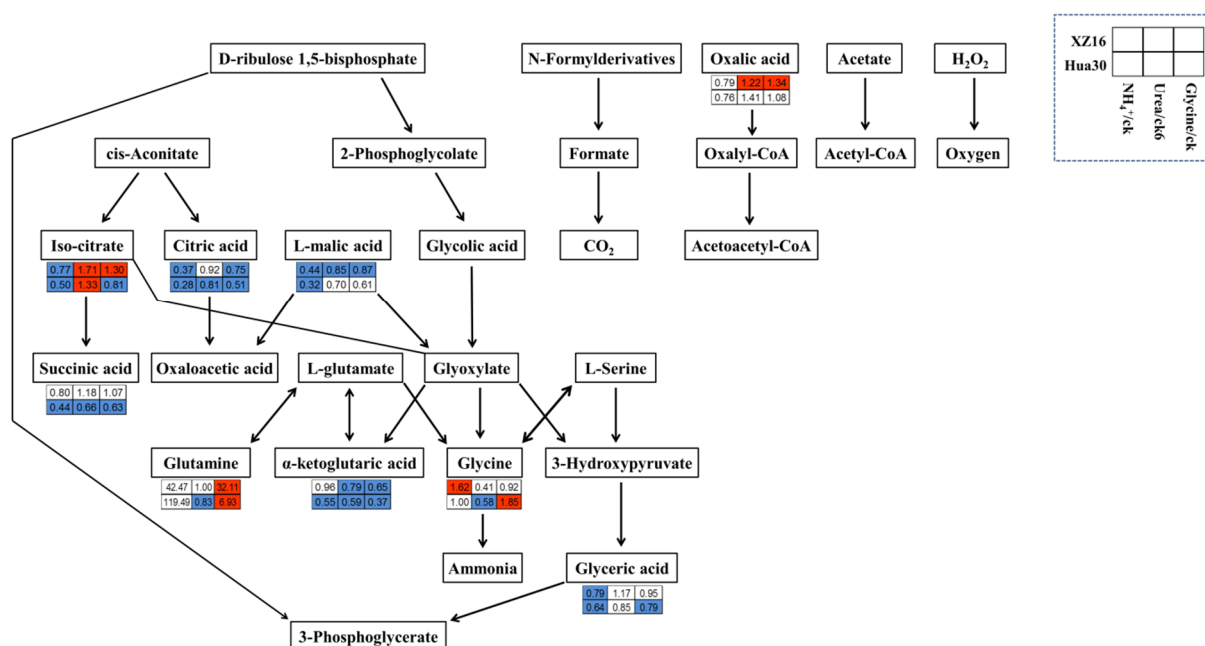

**Figure S1.** Variations in metabolites mapped to the glyoxylate and dicarboxylate metabolism in shoot tissues of XZ16 and Hua30. Fold changes of metabolites in red colour shows significant up-regulation ( $P < 0.05$  and fold change  $> 1$ ) and the blue colour shows significant down-regulation ( $P < 0.05$  and fold change  $< 1$ ), in comparison with normalized metabolite level under N treatment and control; While the white colour shows non-significant changes. KEGG database (<http://www.genome.jp/kegg/> (accessed on 17 January, 2024)) was to construct metabolic pathways.
