# Supplementary material
Source: MDPI journal article supplement (https://www.mdpi.com/2073-4395/14/3/621)
Supplement: s1 [file s1 › Tables S1-S6.xlsx]

## Sheet: Table S1
Table S1. The fold changes of metabolites in the Shoot tissues of two genotypes (XZ16 and Hua30) under ammonium, urea and glycine. The fold changes of metabolites were the ratios in comparison of metabolite normalized content under nitrogen treament and under control conditions. Numbers in red indicate significant (P≤0.05) up-regulated and blue shows significant (P≤0.05) down-regulated metabolite…
Group	Compound Name	Similarity	Retension Time	XZ16						Hua30
				NH4+/CK	P-value	Urea/CK	P-value	Glycine/CK	P-value	NH4+/CK	P-value	Urea/CK	P-value	Glycine/CK	P-value
Carbohydrates and derivatives	sorbose 1	936	17.6298,0	0.909826	0.0362479	1.26289	0.000945917	0.635871	0.000843452	1.33656	0.0584242	1.48998	0.0131279	0.936805	0.709405
	Turanose 1	576	25.1396,0	2.5755	0.0452798	1.60539	0.0359871	1.17528	0.664339	11.1324	1.21908e-05	7.38485	0.0442601	10.1272	0.0191345
	mannose 2	923	17.9333,0	1.19627	0.0555759	1.16233	0.0293424	0.833712	0.0449247	1.08803	0.769905	1.4278	0.00128285	1.00084	0.994325
	sucrose	916	24.2872,0	1.23684	0.416253	0.921023	0.825993	1.12881	0.649428	0.703539	2.38249e-05	0.733659	2.77982e-05	0.741188	3.82748e-05
	maltose	887	25.03,0	1.21421	0.111669	1.31533	0.0629765	0.889873	0.279379	1.22097	0.545297	0.989658	0.975254	1.24138	0.326045
	Gentiobiose 1	872	25.6066,0	1.11405	0.514486	1.49958	0.0902768	1.34528	0.292769	1.54473	0.0409202	1.87673	0.197167	1.58173	0.129945
	D-Talose 1	862	17.8563,0	0.718048	0.348814	0.958259	0.88697	0.343554	0.0599585	0.872704	0.741059	0.43463	0.0439121	0.135522	0.00319047
	Galactinol 1	861	26.7529,0	1.21161	0.10707	3.03803	0.00608766	1.51926	0.0010645	1.30382	0.0196668	1.03538	0.958288	1.06374	0.558372
	cellobiose 2	813	24.973,0	1.04415	0.626224	0.979425	0.838311	0.984927	0.887832	1.40464	0.0164735	1.09586	0.84937	1.0703	0.836437
	xylose 2	811	15.3169,0	0.980684	0.747952	1.00632	0.928263	0.84333	0.163768	1.22084	0.601155	0.682108	0.549543	0.851419	0.679934
	melibiose 1	840	25.9179,0	0.627591	0.00579162	0.948146	0.843883	0.716165	0.0938628	0.893171	0.642122	1.17433	0.641046	0.911466	0.67136
	Lyxose 1	814	15.2357,0	0.827621	0.0115264	0.997301	0.966839	0.537778	0.000747942	1.06542	0.606374	1.27073	0.0272743	0.608839	0.00610638
	2-deoxy-D-glucose 1	639	16.7031,0	1.25024	0.0105471	1.02549	0.810494	0.904688	0.35223	1.19416	0.216423	0.980079	0.896266	1.02392	0.85193
	glucose-6-phosphate 2	655	21.9206,0	0.835616	0.711204	0.703797	0.461746	1.00869	0.974794	3.82585	0.0461102	2.31719	0.369472	1.84296	0.525933
	lactose 1	639	24.8432,0	1.51888	0.3208	0.883793	0.437025	0.499515	0.374479	0.606125	0.362612	0.18327	0.0314108	0.790484	0.631786
	glycerol	854	10.4483,0	1.04419	0.378599	1.17723	0.014356	1.05234	0.38946	0.736461	0.250875	0.644666	0.256686	0.525246	0.0826356
	fucose 1	565	15.9455,0	0.666497	0.291053	1.18415	0.012847	0.723626	0.2086	0.325075	0.106252	0.711548	0.462029	0.493974	0.17078
	Tagatose 1	545	17.2895,0	2.48875	0.149384	6.75422e-06	0.090201	8.40054	0.000554901	1.43656	0.387308	0.427479	0.323416	1.42135	0.294399
	myo-inositol	911	19.7465,0	1.33541	0.000652211	1.51085	0.00192841	1.29352	0.000967262	0.910489	0.722728	1.04187	0.882794	0.901114	0.191509
	2-Deoxy-D-galactose 2	574	16.8866,0	2.91005	0.0838404	0.0114403	0.137354	16.6372	0.0106099	0.921486	0.841647	0.257463	0.0983841	1.22601	0.651972
	1-Kestose	857	30.0286,0	0.87762	0.649502	1.28421	0.544996	0.173978	0.0157701	0.728628	0.270192	0.901288	0.753224	0.193058	0.00809495
	lactulose 1	537	24.6291,0	1.85708	0.203918	1.66361	0.160996	1.94377	0.123652	3.95211	0.00616127	23.2852	0.0177951	16.7105	0.0466821
	Digitoxose 1	349	14.705,0	3.27914	0.0789474	4.76221	1.84959e-05	1.65406	0.232872	6.79324	1.71365e-05	4.86051	0.0215539	4.76874	0.00299194
	Sedoheptulose	773	18.2525,0	1.29279	0.00996133	0.773401	0.00312884	1.20439	0.0188443	0.919431	0.433142	0.58726	0.00203261	1.0974	0.475533
	L-Threose 2	258	12.8423,0	0.0682178	6.39881e-07	0.0306012	2.00164e-07	0.135544	6.73332e-07	4.9146e-06	0.00121425	5.28991e-06	0.00121425	0.0483452	8.87411e-05
	allose 1	533	15.188,0	1.68181	0.024911	1.11647	0.137504	0.951655	0.704398	3.22723	0.000130769	2.91842	0.000267731	2.61468	0.00176838
	d-Glucoheptose 1	625	20.1659,0	0.967809	0.66258	1.01268	0.896723	0.676652	0.00467141	1.5726	0.00275735	1.64164	0.00456259	1.50904	0.0583196
	Sophorose 2	441	25.4251,0	0.481782	0.156068	0.470649	0.140421	0.648128	0.0978226	3.11132e-05	0.0241365	1.01038	0.983997	0.891781	0.782554
	sorbitol	472	18.3065,0	80.3621	0.373903	0.998444	0.93729	0.887545	0.000548288	108.596	0.37391	42.1653	0.0726446	7.14908	0.373916
	trehalose-6-phosphate	376	28.2102,0	1.25346	0.0387902	1.55606	0.120381	1.39702	0.0107071	1.11601	0.387422	1.08939	0.659959	0.775828	0.368297
	D-(glycerol 1-phosphate)	841	16.4596,0	1.94431	9.98571e-06	1.18291	0.0818665	2.07904	0.00412211	1.84328	0.0006823	1.17196	0.161945	1.44087	0.0219221
	3,6-Anhydro-D-galactose 1	502	15.7409,0	1.61514	0.0129726	2.71899	0.0752274	3.89344	0.143687	8.11934	0.00529418	8.5601	0.00483205	2.88045	0.381974
	Fructose 2,6-biphosphate degr prod 1	498	20.6847,0	1.04864	0.392979	0.993559	0.920514	1.04576	0.581364	1.00049	0.998629	1.25798	0.0526722	1.06384	0.546773
	fructose 2	901	17.7265,0	0.888772	0.0209407	1.26306	0.000960421	0.625483	0.00144308	1.05652	0.857294	1.50475	0.0191146	0.964285	0.851041
	fructose 1	857	17.5915,0	0.361785	0.277898	1.4701	0.323615	0.733324	0.618953	2.90514	0.255773	3.79884	0.0478451	1.49531	0.724349
	Levoglucosan	469	15.8285,0	0.939492	0.44471	0.794058	0.0644831	0.772439	0.322002	1.69889	0.478975	1.92024	0.212531	1.42898	0.699587
Glycolysis	Glucose-1-phosphate	906	16.5097,0	0.789487	0.00191263	0.712726	0.000521045	0.705066	0.0005741	0.88717	0.68676	0.794608	0.467446	0.752086	0.395376
	glucose 2	932	18.0905,0	1.08918	0.240715	1.07127	0.256757	0.659018	0.11292	1.66052	0.063821	1.70368	0.0531987	1.20706	0.482457
	fructose-6-phosphate	409	21.6281,0	1.07672	0.201438	1.10016	0.285525	1.12715	0.0163591	0.907102	0.819543	0.540216	0.320507	0.808415	0.67139
	D-Fructose 1,6-bisphosphate 1	292	24.6701,0	1.32314	0.2859	1.17701	0.540491	1.51239	0.118773	0.00043129	0.258449	2.38919	0.278026	1.13149	0.901363
	Pyruvic acid	878	7.33532,0	0.757763	0.324956	0.905701	0.522523	0.597556	0.00368214	0.790617	0.513295	0.735592	0.416079	0.506113	0.156317
TCA Cycle	citric acid	872	17.0857,0	0.374126	1.00693e-06	0.916968	0.135451	0.746659	0.00129416	0.282735	3.77797e-06	0.806552	0.0175936	0.508441	0.00103801
	isocitric acid 1	734	17.0969,0	0.765826	0.00580765	1.7079	5.27932e-06	1.29715	0.0045638	0.497273	0.000162714	1.33274	0.00639351	0.808698	0.0300611
	Aconitic Acid	656	16.3323,0	1.28266	0.089673	1.0661	0.762693	2.05075	0.00075434	1.1716	0.133317	0.634732	0.267029	0.811645	0.61441
	alpha-ketoglutaric acid	821	14.3733,0	0.963103	0.771671	0.785486	0.0407551	0.648921	0.002543	0.549392	0.00126089	0.592975	0.00318867	0.373402	3.33766e-05
	succinic acid	935	11.028,0	0.800568	0.653482	1.17553	0.692514	1.07379	0.885012	0.437695	0.000203577	0.660762	0.00461661	0.627746	0.00328875
	L-Malic acid	907	13.3333,0	0.437847	2.60605e-07	0.846847	0.0410271	0.86545	0.014063	0.324364	0.057175	0.696199	0.300248	0.605595	0.197361
	fumaric acid	852	11.5389,0	0.335311	0.000931117	0.450356	0.00162478	0.67423	0.0171909	0.446572	0.100307	0.83287	0.561936	0.836769	0.571803
Amino acids and derivatives	aspartic acid 1	944	13.7085,0	0.923644	0.246331	0.473148	7.83525e-05	1.66098	3.80752e-05	0.668873	0.0107259	0.627906	0.0015116	1.315	0.00652876
	serine 1	935	11.6103,0	1.07661	0.487088	0.470601	0.000110468	1.36577	0.00581878	1.70339	5.22992e-05	1.11089	0.147664	1.28283	0.0226238
	L-Allothreonine 1	932	11.9423,0	1.14115	0.061421	0.52892	0.000110549	1.34005	0.000431047	1.10042	0.331487	0.845375	0.0529687	1.32742	0.00884967
	proline	925	10.7905,0	1.15397	0.543673	0.477108	0.0113272	1.43872	0.00606706	0.0912496	4.0357e-05	1.14107	0.559595	1.49614	0.315486
	oxoproline	923	13.7913,0	0.915861	0.233246	0.316659	1.97549e-05	1.11985	0.256157	1.36395	0.0364136	0.618298	0.00769935	1.04993	0.914032
	glycine 2	919	10.8915,0	1.62466	0.0516585	0.414883	0.0241923	0.922138	0.900598	0.996226	0.974632	0.576033	0.000218344	1.8491	0.0142845
	alanine 1	957	8.03247,0	1.08533	0.609769	0.38957	0.000248948	1.41176	0.047721	0.766425	0.168067	0.5989	0.00376073	1.15828	0.333127
	valine	940	9.62154,0	1.29299	0.0331292	0.607875	0.00947149	1.30918	0.0617305	1.38257	0.357919	1.24254	0.0410829	1.52722	0.000248845
	Isoleucine	898	10.7114,0	1.31465	0.19398	0.563514	0.000464044	1.30493	0.0321424	0.828306	0.70146	1.10282	0.661679	1.39304	0.154233
	asparagine 4	889	13.5703,0	65.8619	0.000749605	0.559565	0.62669	26.6236	0.000269681	103.984	0.00124297	8.81013	0.00911009	23.2908	0.00121808
	glutamine 1	884	16.6404,0	42.4701	0.373901	0.998444	0.93729	32.1076	0.0146809	119.486	0.0762896	0.832498	0.00999608	6.92776	0.00136653
	5-Methoxytryptamine 2	566	22.9859,0	0.204185	0.0350599	0.666331	0.292145	0.182493	0.0368486	0.259206	0.0912225	1.44887	0.484181	0.919079	0.868355
	asparagine 1	860	15.4998,0	0.906558	0.389998	0.742361	0.247968	0.382781	0.039546	1.02112	0.928006	1.07078	0.767656	0.52743	0.158101
	phenylalanine 1	761	14.9946,0	1.14539	0.400355	0.449951	0.00345558	1.65285	0.000544448	0.82504	0.611709	0.681008	0.104362	0.834562	0.588036
	tryptophan 1	758	20.9308,0	2.43153	0.411428	0.447902	0.186396	11.3193	3.70495e-08	6.26118	0.135755	0.296034	0.127711	4.73138	0.131069
	tyrosine 2	735	17.9747,0	0.999765	0.999223	0.72033	0.151023	0.98403	0.915973	1.59082	0.126497	1.6286	0.161403	0.573317	0.163777
	3-Cyanoalanine	801	11.8481,0	110.519	0.00199427	0.461361	0.405903	267.263	0.00102725	50.779	0.00130607	5.77146	0.00992176	87.996	0.0113209
	threonine 2	572	10.7534,0	0.823032	0.00897315	0.937863	0.202297	0.659902	0.114682	0.648645	0.0903821	0.773713	0.303694	0.801549	0.024682
	lysine	566	18.1639,0	91.9838	0.00650745	52.7655	0.373902	111.934	0.00491219	2.80236	0.218629	2.77116	0.0497424	1.58298	0.597019
	methionine 1	273	13.6977,0	2.58715	0.086355	5.46453e-05	0.0720716	2.47631	0.0842611	7.43499	0.0801958	7.45747	0.129636	9.37755	0.0137933
	L-homoserine 1	690	12.788,0	58.1492	0.0167506	0.998444	0.93729	178.459	0.000705117	5.58831	0.00155668	0.230313	0.290606	21.834	7.41007e-07
	beta-Alanine 2	426	12.5719,0	0.665693	0.116673	0.862783	0.00772622	0.84108	0.00210765	0.739901	0.00018481	0.800046	0.000679392	0.623303	0.0743594
	ornithine	307	14.7898,0	18.5085	0.000228495	0.998444	0.93729	4.54712	0.00012517	2.57663	0.000642378	4.87419	0.000933836	4.15248	0.000268685
Organic acids	D-Glyceric acid	927	11.1936,0	0.794141	0.0157746	1.16542	0.0663177	0.950933	0.521869	0.63961	0.000270989	0.85204	0.129502	0.794239	0.00959219
	glycolic acid	886	7.66726,0	1.03526	0.738468	1.07046	0.0995061	1.02613	0.429055	0.907445	0.0831985	1.00173	0.977835	0.946536	0.308936
	Threonic acid	919	14.1188,0	0.811588	0.0227458	0.924414	0.261474	1.14923	0.0610997	0.672457	0.005849	0.901328	0.301476	0.826154	0.460998
	quinic acid	902	17.465,0	0.552475	0.000229976	1.01185	0.871459	0.819885	0.030744	0.799575	0.0705384	1.3358	0.0886476	1.1305	0.360721
	glutamic acid	849	14.8733,0	0.449432	0.000101695	0.162228	2.28791e-05	0.71294	0.032272	0.331713	0.00185906	0.354306	0.00247643	0.484114	0.0189142
	Galactonic acid	833	18.7857,0	1.19461	0.125825	0.897514	0.312118	2.06031	1.54185e-06	0.866081	0.450577	0.648613	0.0203954	1.05401	0.684316
	lactic acid	688	7.41903,0	0.879162	0.727582	1.17047	0.534875	1.09644	0.722829	0.872156	0.791051	1.10379	0.84095	1.1119	0.799132
	gluconic acid 1	797	19.0026,0	1.09992	0.527188	1.20438	0.138939	1.27113	0.0181919	1.05899	0.662717	0.785744	0.394881	0.91853	0.573431
	ascorbate	580	18.3185,0	0.73603	0.457702	0.992606	0.980033	0.720521	0.35432	0.957882	0.760575	0.623841	0.257882	0.745573	0.175869
	malonic acid 1	602	9.3751,0	1.72098	0.193576	0.684629	0.294306	3.7154	0.00049179	2.2162	5.83606e-05	1.33792	0.0477431	2.8453	0.00775681
	Citramalic acid	632	13.0579,0	0.896599	0.627789	0.850755	0.56076	0.727622	0.60955	0.769243	0.00670752	0.959885	0.779296	0.677907	0.317797
	oxalic acid	627	8.4239,0	0.793744	0.387024	1.21831	0.0304272	1.33703	0.00748741	0.757951	0.507633	1.40533	0.228328	1.08478	0.792837
	mucic acid	572	19.4393,0	2.55282	8.37093e-07	2.37398	4.21346e-08	2.30821	7.81779e-07	1.43741	0.0153717	1.22397	0.192563	1.37128	0.15238
	4-aminobutyric acid 1	939	13.8441,0	1.2774	0.0737177	1.24389	0.153052	1.78473	0.000910807	1.2274	0.038605	1.15841	0.147407	1.66433	0.00051995
	Methylmalonic acid	681	9.48231,0	0.920838	0.481019	1.24182	0.0287981	1.34674	0.0123438	0.615905	0.000737023	0.85921	0.562599	0.832913	0.151937
	Glucoheptonic acid 3	623	20.1095,0	1.01875	0.849561	1.04806	0.705367	0.756875	0.0547742	1.66431	0.00208032	1.59894	0.0095667	1.59212	0.0271947
	Gluconic lactone 3	264	18.2217,0	0.720601	0.504584	1.41102	0.166686	1.60883	0.241198	1.38338	0.403585	1.79432	0.127142	1.03245	0.958528
	Pyrrole-2-Carboxylic Acid	224	11.6355,0	22.7723	0.182116	56.3064	0.373901	43.7196	0.017102	73.5248	4.13807e-06	37.5667	0.0801383	6.82337	0.000781936
	Glutaric Acid	438	12.1321,0	0.820381	0.0945698	1.07457	0.563416	1.10804	0.027946	1.17836	0.0844941	1.31734	0.0561258	1.06254	0.63778
	Tartronic acid	258	12.0363,0	0.736919	0.442786	0.125354	0.0167607	1.27203	0.545324	0.0960734	0.00847058	0.0572572	0.0174481	0.638746	0.454067
	2-hydroxy-3-isopropylbutanedioic acid	482	14.3975,0	1.17798	0.0488179	1.09666	0.132911	1.20386	0.0657294	1.38722	0.415512	1.31248	0.506785	1.52873	0.283492
	3-Aminoisobutyric acid 1	573	12.9329,0	0.715436	1.2585e-06	0.564445	1.64069e-06	0.673403	3.50684e-06	0.477547	4.24322e-07	0.475236	1.31233e-07	0.552497	4.9531e-06
	2,3-Dimethylsuccinic acid	455	11.7665,0	0.929695	0.169618	0.802395	0.00505852	1.06689	0.246366	0.668744	0.0646122	0.767125	0.183277	0.457095	0.0540178
	4-Hydroxybenzoic acid	444	15.0509,0	1.4388	0.212119	0.336243	0.13504	1.62269	0.081196	2.44578	0.000157227	2.35452	0.000951145	2.09368	0.00276336
	toluenesulfonic acid	435	15.022,0	33.5526	1.03957e-05	0.830881	0.57113	68.9564	0.000123026	35.8341	8.3043e-06	7.1886	0.00898192	72.9366	0.000209827
	Aminomalonic acid	355	13.0469,0	1.09578	0.851391	1.50515	0.286791	0.902707	0.86447	0.779897	0.00259798	0.73009	0.218441	0.671986	0.124912
	maleic acid	490	10.8395,0	2.62081e-05	0.0167427	2.75021e-05	0.0167428	2.44474e-05	0.0167426	3.1865e-05	0.0741854	3.42985e-05	0.0741858	3.07092e-05	0.0741851
	Guanidinosuccinic acid 3	296	18.9667,0	18.5059	1.68261e-06	20.0088	2.35827e-06	10.0347	0.012904	3.88871	0.00338736	5.1743	0.00250344	4.64388	0.00224739
	8-Aminocaprylic acid	590	18.1488,0	1.54967	0.000509648	1.01246	0.905777	1.67929	0.00262979	1.07095	0.884578	1.46445	0.0096868	1.42256	0.342766
	Dehydroascorbic Acid 1	582	17.3719,0	2.03959	0.0205657	2.63003	0.0134247	1.64505	0.0169802	1.68472	0.546113	2.8509	0.074967	2.1785	0.000201232
	3-Hydroxypropionic acid 1	502	8.57804,0	1.15663	0.192674	2.17374	8.74413e-06	1.37904	0.0312133	1.3876	0.000398275	2.11498	4.64129e-08	1.36414	0.0506966
	2-Hydroxyvaleric acid	317	9.45559,0	0.766795	0.00510743	0.727438	0.00190049	0.719546	0.000572752	0.832448	0.115666	1.0565	0.448755	0.742835	0.00482281
	succinate semialdehyde 1	273	9.24551,0	0.615562	0.064382	0.56017	0.00800187	1.04793	0.626299	0.638252	0.192662	0.63649	0.204496	0.954075	0.839513
Lipids and fatty acids	linolenic acid	927	20.9859,0	1.5401	0.0529029	0.434992	0.0138832	1.57014	0.0538178	1.10629	0.783457	1.58189	0.0738712	1.04602	0.848225
	stearic acid	928	21.2031,0	1.52299	0.271042	1.43401	0.351265	1.60973	0.213231	0.77658	0.323457	1.04217	0.505757	0.918579	0.0786565
	linoleic acid	840	20.9232,0	1.4616	0.0286194	0.536897	0.00285208	1.66757	0.0155489	1.25673	0.516515	1.85575	0.0190899	1.08357	0.653583
	Pipecolinic acid	781	11.6998,0	0.141427	0.00185853	0.320361	0.00126987	0.563437	0.0153247	0.416504	0.146914	1.49629	0.374742	1.16658	0.648048
	oleic acid	632	20.9758,0	1.1046	0.871482	0.986346	0.976021	1.42413	0.582805	1.43942	0.532616	1.86492	0.241885	0.817079	0.713961
	palmitic acid	943	19.406,0	0.820888	0.220473	0.781685	0.150383	0.850144	0.278998	1.19429	0.0145074	1.19188	0.00987711	0.930198	0.261328
	Arachidic acid	399	22.873,0	0.669459	0.172342	0.677623	0.0533176	0.91013	0.755063	0.882133	0.670597	0.940799	0.551889	0.577344	0.300946
	Elaidic acid	311	21.1288,0	1.40888	0.376066	1.4667	0.321792	1.24428	0.651484	0.916303	0.814795	0.953567	0.898248	1.01833	0.947871
	palmitoleic acid	440	19.3161,0	1.06078	0.450015	1.13908	0.37852	1.30663	0.0535466	0.910544	0.772911	1.11106	0.621678	0.813193	0.647264
	Myristic Acid	482	17.4699,0	0.275083	0.0463874	0.259293	0.062036	0.488764	0.231577	4.07995	0.0602643	5.7533	0.00267825	3.71085	0.101387
N Compounds	2-hydroxypyridine	875	7.18841,0	0.871538	0.00363403	1.04623	0.333277	0.908881	0.0209112	0.965353	0.467395	0.949239	0.844589	0.923951	0.0668108
	putrescine 2	862	16.2142,0	0.640297	0.60569	1.05081	0.799571	1.36395	0.0112371	1.06472	0.954618	1.80721	0.00201777	1.03213	0.00386684
	guanosine	721	25.3028,0	1.32303	0.0106591	0.692887	0.00767489	1.52664	0.00340262	0.971569	0.947001	0.719211	0.565617	0.703744	0.51235
	Purine riboside	635	22.2044,0	0.967003	0.384503	1.01243	0.738347	0.514334	0.198095	5.52412	0.000369631	6.92362	0.000152863	5.58177	0.0172672
	uracil	532	11.381,0	0.901512	0.29508	0.495678	0.000452855	0.715633	0.185931	1.14783	0.398881	0.99295	0.966624	1.23858	0.219905
	Ethanolamine	942	10.3338,0	0.726383	0.000481303	0.816057	0.00202379	0.776061	0.000319236	0.850431	0.0365704	0.847688	0.0307255	0.787832	0.0179419
	ribose-5-phosphate 1	208	19.9428,0	0.597998	0.0659749	0.820497	0.222748	0.665883	0.0195129	0.859871	0.856384	2.00758	0.27939	1.07077	0.924652
	uridine 1	442	23.0461,0	1.34871	0.223403	0.346683	0.00160671	0.845768	0.311169	2.88326	0.0772571	1.77065	0.123388	1.99365	0.314964
	1,3-diaminopropane	594	15.1692,0	1.16125	0.0166879	0.798737	0.0109854	0.992473	0.928622	1.37794	0.0724931	0.869028	0.554228	0.798168	0.461096
	1-Methyladenosine 2	433	22.214,0	6.58935	0.0931292	0.000313159	0.373901	3.08487	0.358321	1.54508	0.522361	2.64938	0.0993538	2.10153	0.181551
Others	N-Acetyl-beta-D-mannosamine 4	767	19.8962,0	0.969212	0.586288	0.972613	0.652133	0.655311	0.104773	1.64609	0.19667	1.7515	0.143157	1.31259	0.496776
	alpha-D-glucosamine 1-phosphate	700	16.9702,0	0.397497	5.58549e-07	0.884881	0.133794	0.919247	0.488308	0.573939	0.164748	1.30986	0.295282	1.09328	0.73477
	beta-Mannosylglycerate 1	619	20.8052,0	1.67937	0.427392	0.455315	0.410272	2.497	0.0928274	5.68091	0.0083169	4.5852	0.0641814	3.95487	0.0865777
	Phenyl beta-D-glucopyranoside	594	21.7073,0	2.10435	0.000415845	1.91008	0.000776915	2.26517	2.93276e-05	0.894135	0.795196	1.29646	0.0737551	0.993708	0.969641
	1,2-Cyclohexanedione 4	573	15.4557,0	0.782002	0.134503	1.04245	0.827722	0.718026	0.578395	1.11177	0.9276	3.45287	0.00213834	2.37891	0.419079
	salicin	573	23.2442,0	1.08942	0.269355	0.599074	0.000196642	0.848525	0.00642764	1.02465	0.929144	0.904582	0.209496	0.742203	0.00481282
	trans-sinapinic acid	530	21.2448,0	0.929626	0.625236	0.725799	0.0888232	0.962207	0.818374	1.10214	0.792751	1.20317	0.638384	1.35063	0.269453
	2-Monopalmitin	526	23.5437,0	1.15619	0.03216	0.823533	0.0514424	1.28239	0.00835843	1.03511	0.681621	0.691508	0.000321893	0.92035	0.194577
	sulfuric acid	482	8.90065,0	0.82831	0.0256142	1.08679	0.495749	0.497424	4.6341e-06	1.02901	0.770463	1.11233	0.341625	0.542279	0.000664814
	5'-methylthioadenosine 1	476	25.494,0	0.885397	0.646221	0.277297	0.00545941	0.903192	0.354737	0.867068	0.227901	0.704202	0.00606299	0.713911	0.174784
	21-hydroxypregnenolone 2	439	27.2371,0	0.673512	0.307319	0.409385	0.064728	0.972117	0.920701	0.41702	0.358666	0.875398	0.83093	0.585003	0.479686
	Isopropyl-beta-D-thiogalactopyranoside	429	19.537,0	1.20979	0.179576	0.842783	0.165311	3.8924	0.0193284	0.708555	0.276182	0.472861	0.0825576	0.916697	0.752756
	1-Monopalmitin	429	23.9783,0	0.935267	0.816408	0.891236	0.697485	1.19135	0.515873	0.794363	0.043036	0.916008	0.444691	0.968909	0.744989
	arbutin	380	23.7312,0	65.3051	0.0178714	0.998444	0.93729	16.6546	0.018362	13.8187	0.0170277	12.7081	0.373906	12.6357	0.0997592
	naringin	371	29.7812,0	3.78344	0.0840569	3.40652	0.198987	3.36655	0.203331	1.20622	0.702742	0.905867	0.869329	0.584369	0.473871
	4-Acetamidobutyric acid 2	368	13.5449,0	1.44626	0.00683342	0.403716	3.74899e-05	3.53067e-06	2.2506e-06	0.0433227	0.0193809	0.143862	0.027997	2.66154e-06	0.0176506
	2-Hydroxyestrone	367	26.0934,0	0.836851	0.692384	0.705161	0.437568	0.888992	0.816564	0.673172	0.0394261	1.01659	0.910785	0.761856	0.360945
	5-Dihydrocortisol 1	338	27.9597,0	0.24355	0.446916	1.13394	0.92825	1.59197	0.731554	1.76951	0.321207	0.768615	0.754751	1.41674	0.616394
	Maleamate 2	337	13.9067,0	18.3573	0.0857207	29.5342	0.373901	21.0711	0.0762141	29.2728	0.0205286	49.0426	0.197263	6.67901	0.000767672
	(2R,3S)-2-hydroxy-3-isopropylbutanedioic acid	332	14.2591,0	19.7942	0.000463395	0.401842	0.167582	57.9089	0.000545565	16.6185	0.000916969	1.96631	0.00996886	20.9716	0.0222207
	5-aminovaleric acid lactam	322	8.81804,0	1.61696	0.0267802	1.85545	0.00724078	2.68024	3.62775e-05	2.64848	0.00375564	2.2315	0.0941276	4.117	0.000879717
	Cholestane-3,5,6-triol, (3?5?6?-	313	30.2304,0	0.635039	0.318687	0.806564	0.596997	0.851122	0.694305	1.15172	0.645898	1.40857	0.124606	1.35998	0.072389
	trans-3,5-Dimethoxy-4-hydroxycinnamaldehyde 1	299	20.0598,0	1.09476	0.862181	5.79545e-05	0.0189462	0.830438	0.665932	1.34994	0.684957	0.119451	0.249715	1.47387	0.61172
	N-Acetyl-D-galactosamine 1	283	19.7593,0	1.70552	0.0333052	0.918139	0.863717	1.8331	0.0303615	0.706008	0.189348	0.650758	0.0975749	0.835862	0.119146
	9-Fluorenone 1	258	18.5442,0	1.16614	0.567682	1.21676	0.470187	0.995324	0.986939	1.19066	0.0178622	1.20263	0.00166684	0.943127	0.157869
	Citraconic acid degr1	255	9.97834,0	0.879185	0.0278207	0.875298	0.00491857	0.673553	0.128926	0.627847	0.0773804	0.873928	0.00295246	0.848471	0.00228924
	D-alanyl-D-alanine 2	252	14.8431,0	5.22888	0.11349	0.000141117	0.3739	17.4947	1.1685e-05	3.66987	0.0503276	5.75875e-05	0.194772	3.63208	0.0587271
	D-erythronolactone 2	248	14.6681,0	0.777227	0.680969	1.23846	0.659838	0.478957	0.336186	0.584567	0.045675	0.79441	0.359709	0.869953	0.201476
	N-Acetyltryptophan 2	236	22.367,0	1.38616	0.649994	1.71258	0.467032	2.14302	0.193597	0.884694	0.241275	1.00411	0.907369	0.853711	0.00660809
	N-cyclohexylformamide 1	225	10.5529,0	0.667697	0.119282	0.953409	0.285832	0.859381	0.0183214	0.839236	0.002127	0.992297	0.86228	0.855844	0.00538612
	1,4-Cyclohexanedione 1	217	11.0397,0	0.566954	0.0279851	0.752388	0.0128737	0.804094	0.037137	0.671442	0.134059	0.964665	0.656321	0.672223	0.135114
	phosphate	907	10.4516,0	1.12558	0.014176	1.2377	0.489292	0.99671	0.930699	0.955586	0.270616	1.1248	0.15132	0.862702	0.019989
	Methyl Phosphate	879	9.13514,0	1.07188	0.416201	1.05562	0.468942	0.935985	0.397358	1.29114	0.0260438	1.09833	0.487676	0.748037	0.0475984
	Fluorene	400	15.0688,0	6.66475	0.0161171	0.000574431	0.222847	19.3931	0.022125	19.5761	0.027752	1.77147	0.575702	48.1214	0.000604117
	xanthotoxin 2	399	21.5714,0	1.26187	0.0119123	1.17832	0.468386	1.27246	0.0703706	1.32386	0.528304	1.35741	0.601242	1.72958	0.204678
	estriol	311	26.4141,0	1.23776	0.0320629	1.57998	0.000351424	1.25833	0.472858	0.937089	0.541821	1.13674	0.246419	0.916627	0.318011
	Acetol 4	210	15.8676,0	0.776171	0.0659906	0.80093	0.0828736	0.658258	0.109962	1.00487	0.952493	1.05074	0.375023	1.11931	0.0727905
	2-aminoethanethiol	637	21.0339,0	0.179418	0.0354889	0.852533	0.655226	0.269778	0.0514385	0.244473	0.0512976	1.24379	0.613135	0.318663	0.0550649
	flavin adenine degrad product	626	16.2013,0	1.73528	1.36007e-06	1.01638	0.858603	1.33302	0.000241389	1.51224	0.000899088	0.908338	0.431532	1.08744	0.321451

## Sheet: Table S2
Table S2. Top 52 pathways under different nitrogen treatments in the shoot tissues of two genotypes (XZ16, Hua30) through KEGG pathway analysis.
Pathway Name	Total	Expected	Hits	Raw p-value	-log(p)	Holm adjust	FDR	Impact
Alanine, aspartate and glutamate metabolism	22	1.0092	9	1.5988e-07	6.7962	1.4549e-05	1.4549e-05	0.59712
Glyoxylate and dicarboxylate metabolism	29	1.3303	9	2.4914e-06	5.6035	0.00022423	0.00011336	0.32823
Citrate cycle (TCA cycle)	20	0.91743	6	0.00017276	3.7626	0.015375	0.0052402	0.27905
Carbon fixation in photosynthetic organisms	21	0.9633	6	0.00023321	3.6322	0.020523	0.0053056	0.12873
Biosynthesis of unsaturated fatty acids	22	1.0092	6	0.00030921	3.5097	0.026902	0.0056277	0
Glycine, serine and threonine metabolism	33	1.5138	7	0.00051142	3.2912	0.043982	0.0077566	0.43736
Butanoate metabolism	17	0.77982	5	0.00070233	3.1535	0.059698	0.0091303	0.36363
Arginine biosynthesis	18	0.82569	5	0.00093823	3.0277	0.078811	0.009308	0.13981
beta-Alanine metabolism	18	0.82569	5	0.00093823	3.0277	0.078811	0.009308	0.3254
Galactose metabolism	27	1.2385	6	0.0010229	2.9902	0.083874	0.009308	0.14986
Pentose phosphate pathway	19	0.87156	5	0.0012285	2.9106	0.09951	0.010163	0.38631
Valine, leucine and isoleucine biosynthesis	22	1.0092	5	0.0024992	2.6022	0.19993	0.018952	0.12872
Monobactam biosynthesis	8	0.36697	3	0.004376	2.3589	0.3457	0.030632	0
Lysine biosynthesis	9	0.41284	3	0.00635	2.1972	0.4953	0.041275	0
Fructose and mannose metabolism	18	0.82569	4	0.0075959	2.1194	0.58488	0.046082	0.31749
Starch and sucrose metabolism	22	1.0092	4	0.015812	1.801	1	0.084643	0.20974
Cyanoamino acid metabolism	22	1.0092	4	0.015812	1.801	1	0.084643	0.375
Pantothenate and CoA biosynthesis	25	1.1468	4	0.024661	1.608	1	0.12467	0.11678
Glutathione metabolism	27	1.2385	4	0.031943	1.4956	1	0.15299	0.07071
Arginine and proline metabolism	28	1.2844	4	0.036012	1.4436	1	0.16245	0.20795
D-Amino acid metabolism	7	0.3211	2	0.037488	1.4261	1	0.16245	0
Glycerolipid metabolism	19	0.87156	3	0.052775	1.2776	1	0.2183	0.18589
Ascorbate and aldarate metabolism	20	0.91743	3	0.060108	1.2211	1	0.23782	0.13265
Pyruvate metabolism	23	1.055	3	0.084761	1.0718	1	0.32139	0.29205
Lipoic acid metabolism	24	1.1009	3	0.093807	1.0278	1	0.34146	0.0016
Vitamin B6 metabolism	12	0.55046	2	0.10171	0.99263	1	0.35468	0
Pyrimidine metabolism	40	1.8349	4	0.10696	0.97078	1	0.35468	0.10143
Fatty acid biosynthesis	56	2.5688	5	0.10933	0.96125	1	0.35468	0.01123
Glycolysis / Gluconeogenesis	26	1.1927	3	0.11303	0.94681	1	0.35468	0.27366
Sulfur metabolism	15	0.68807	2	0.14834	0.82873	1	0.43546	0.03315
Cutin, suberine and wax biosynthesis	15	0.68807	2	0.14834	0.82873	1	0.43546	0.16667
Cysteine and methionine metabolism	47	2.156	4	0.16518	0.78204	1	0.46973	0.05238
Linoleic acid metabolism	4	0.18349	1	0.17141	0.76596	1	0.47268	1
Tyrosine metabolism	18	0.82569	2	0.19837	0.70253	1	0.53092	0.07027
Propanoate metabolism	19	0.87156	2	0.21549	0.66656	1	0.56029	0.09653
Lysine degradation	20	0.91743	2	0.23276	0.63309	1	0.5874	0
Valine, leucine and isoleucine degradation	37	1.6972	3	0.23883	0.62191	1	0.5874	0.00991
C5-Branched dibasic acid metabolism	6	0.27523	1	0.24592	0.60921	1	0.58891	0
Thiamine metabolism	22	1.0092	2	0.26751	0.57265	1	0.60859	0
Glucosinolate biosynthesis	22	1.0092	2	0.26751	0.57265	1	0.60859	0
Purine metabolism	70	3.211	4	0.40193	0.39585	1	0.87648	0.01697
Nitrogen metabolism	11	0.50459	1	0.40453	0.39305	1	0.87648	0
Riboflavin metabolism	13	0.59633	1	0.45833	0.33882	1	0.94792	0
Nicotinate and nicotinamide metabolism	13	0.59633	1	0.45833	0.33882	1	0.94792	0
Glycerophospholipid metabolism	38	1.7431	2	0.52832	0.27711	1	1	0.11364
Fatty acid elongation	23	1.055	1	0.66334	0.17826	1	1	0
Amino sugar and nucleotide sugar metabolism	52	2.3853	2	0.70106	0.15424	1	1	0.10781
Inositol phosphate metabolism	28	1.2844	1	0.73494	0.13375	1	1	0.09102
alpha-Linolenic acid metabolism	28	1.2844	1	0.73494	0.13375	1	1	0.13002
Terpenoid backbone biosynthesis	29	1.3303	1	0.74734	0.12648	1	1	0
Fatty acid degradation	37	1.6972	1	0.82803	0.081956	1	1	0
Ubiquinone and other terpenoid-quinone biosynthesis	47	2.156	1	0.89402	0.048653	1	1	0

## Sheet: Table S3 (Control-NO3-)
Table S3. Pathways regulated under control (NO3-) in the shoot tissues of two genotypes (XZ16, Hua30) through KEGG pathway analysis.
Pathway Name	Total Cmpd	Hits	Statistic Q	Expected Q	Raw p-value	Holm p	FDR
Pentose phosphate pathway	23	8	35.638	11.111	0.00099358	0.047692	0.02707
Glycerolipid metabolism	16	3	60.344	11.111	0.0011279	0.053011	0.02707
beta-Alanine metabolism	21	5	40.581	11.111	0.002605	0.11983	0.041681
Galactose metabolism	27	6	33.252	11.111	0.0050286	0.22629	0.044741
Glyoxylate and dicarboxylate metabolism	31	7	36.89	11.111	0.0052137	0.2294	0.044741
Cysteine and methionine metabolism	33	2	38.875	11.111	0.0055926	0.24048	0.044741
Glycerophospholipid metabolism	36	2	38.158	11.111	0.0076732	0.32227	0.049686
Valine, leucine and isoleucine degradation	39	3	38.982	11.111	0.0082811	0.33952	0.049686
Histidine metabolism	16	1	57.658	11.111	0.010849	0.43397	0.052076
Nicotinate and nicotinamide metabolism	15	1	57.658	11.111	0.010849	0.43397	0.052076
Glycine, serine and threonine metabolism	33	4	29.287	11.111	0.011955	0.45429	0.052168
Alanine, aspartate and glutamate metabolism	28	10	25.68	11.111	0.018458	0.68296	0.07016
Purine metabolism	70	4	30.803	11.111	0.019002	0.68406	0.07016
Ascorbate and aldarate metabolism	9	1	49.932	11.111	0.022336	0.78176	0.071475
Inositol phosphate metabolism	30	1	49.932	11.111	0.022336	0.78176	0.071475
Linoleic acid metabolism	5	1	47.765	11.111	0.026877	0.88695	0.07921
Pantothenate and CoA biosynthesis	20	4	28.805	11.111	0.028054	0.89772	0.07921
Lysine degradation	30	1	45.267	11.111	0.033012	1	0.0834
Biotin metabolism	10	1	45.267	11.111	0.033012	1	0.0834
alpha-Linolenic acid metabolism	13	1	42.631	11.111	0.040679	1	0.095684
Propanoate metabolism	21	3	31.622	11.111	0.041931	1	0.095684
Glutathione metabolism	28	2	29.557	11.111	0.043855	1	0.095684
Riboflavin metabolism	4	1	38.525	11.111	0.055505	1	0.11584
Arginine biosynthesis	14	5	27.715	11.111	0.062261	1	0.12452
Primary bile acid biosynthesis	46	1	33.525	11.111	0.079447	1	0.14667
Porphyrin metabolism	31	1	33.525	11.111	0.079447	1	0.14667
Lipoic acid metabolism	28	3	20.723	11.111	0.10772	1	0.19151
Biosynthesis of unsaturated fatty acids	36	6	20.541	11.111	0.13184	1	0.22474
Nitrogen metabolism	6	1	25.588	11.111	0.13578	1	0.22474
Citrate cycle (TCA cycle)	20	6	17.441	11.111	0.1552	1	0.24268
Arginine and proline metabolism	36	5	17.72	11.111	0.15673	1	0.24268
Butanoate metabolism	15	4	17.35	11.111	0.16916	1	0.25374
Fatty acid biosynthesis	47	2	18.331	11.111	0.20218	1	0.28662
Fructose and mannose metabolism	20	4	16.325	11.111	0.20303	1	0.28662
Sulfur metabolism	8	1	15.62	11.111	0.25831	1	0.34814
Pyrimidine metabolism	39	4	15.073	11.111	0.26111	1	0.34814
Steroid hormone biosynthesis	87	3	14.794	11.111	0.27691	1	0.35445
Glycolysis / Gluconeogenesis	26	3	14.432	11.111	0.28061	1	0.35445
Valine, leucine and isoleucine biosynthesis	8	3	12.724	11.111	0.34255	1	0.4216
Amino sugar and nucleotide sugar metabolism	42	2	12.834	11.111	0.35336	1	0.42403
Ubiquinone and other terpenoid-quinone biosynthesis	18	1	8.052	11.111	0.42689	1	0.49977
Tyrosine metabolism	42	2	9.3197	11.111	0.48342	1	0.54119
Pyruvate metabolism	23	3	8.9129	11.111	0.48482	1	0.54119
Taurine and hypotaurine metabolism	8	1	5.4735	11.111	0.51533	1	0.56218
Starch and sucrose metabolism	18	3	9.0964	11.111	0.55792	1	0.59511
Fatty acid elongation	38	1	0.11173	11.111	0.92696	1	0.94252
Fatty acid degradation	39	1	0.11173	11.111	0.92696	1	0.94252
D-Amino acid metabolism	15	1	0.069145	11.111	0.94252	1	0.94252

## Sheet: Table S4 (Ammonium-NO4+)
Table S4. Pathways regulated under ammonium (NH4+) in the shoot tissues of two genotypes (XZ16, Hua30) through KEGG pathway analysis.
Pathway Name	Total Cmpd	Hits	Statistic Q	Expected Q	Raw p-value	Holm p	FDR
Arginine and proline metabolism	36	5	44.623	11.111	0.00012662	0.0060778	0.0059098
Pentose phosphate pathway	23	8	36.126	11.111	0.00035965	0.016904	0.0059098
Glutathione metabolism	28	2	58.889	11.111	0.00036936	0.016991	0.0059098
Glycine, serine and threonine metabolism	33	4	36.369	11.111	0.00055111	0.0248	0.0066134
Fructose and mannose metabolism	20	4	30.418	11.111	0.00072815	0.032039	0.0069903
Glycolysis / Gluconeogenesis	26	3	40.744	11.111	0.0010457	0.044967	0.0083659
Fatty acid biosynthesis	47	2	49.947	11.111	0.0058275	0.24475	0.034128
Primary bile acid biosynthesis	46	1	62.612	11.111	0.0063989	0.26236	0.034128
Porphyrin metabolism	31	1	62.612	11.111	0.0063989	0.26236	0.034128
Glyoxylate and dicarboxylate metabolism	31	7	31.778	11.111	0.0077309	0.3015	0.037108
Ubiquinone and other terpenoid-quinone biosynthesis	18	1	57.661	11.111	0.010846	0.41214	0.041634
Glycerolipid metabolism	16	3	48.876	11.111	0.012102	0.44779	0.041634
Fatty acid elongation	38	1	56.527	11.111	0.012143	0.44779	0.041634
Fatty acid degradation	39	1	56.527	11.111	0.012143	0.44779	0.041634
Arginine biosynthesis	14	5	31.084	11.111	0.0183	0.6222	0.05856
Lipoic acid metabolism	28	3	35.379	11.111	0.024699	0.81506	0.070733
Propanoate metabolism	21	3	27.548	11.111	0.025051	0.81506	0.070733
Glycerophospholipid metabolism	36	2	37.919	11.111	0.026762	0.82963	0.071366
beta-Alanine metabolism	21	5	24.71	11.111	0.034667	1	0.08758
Nitrogen metabolism	6	1	41.168	11.111	0.045527	1	0.10926
Valine, leucine and isoleucine degradation	39	3	21.552	11.111	0.12479	1	0.28523
Alanine, aspartate and glutamate metabolism	28	10	17.592	11.111	0.1633	1	0.3563
Lysine degradation	30	1	19.035	11.111	0.20747	1	0.41494
Biotin metabolism	10	1	19.035	11.111	0.20747	1	0.41494
Pyrimidine metabolism	39	4	16.289	11.111	0.21769	1	0.41796
Riboflavin metabolism	4	1	17.359	11.111	0.23101	1	0.41851
D-Amino acid metabolism	15	1	17.065	11.111	0.23541	1	0.41851
Biosynthesis of unsaturated fatty acids	36	6	14.569	11.111	0.26442	1	0.44657
Purine metabolism	70	4	14.689	11.111	0.2698	1	0.44657
Tyrosine metabolism	42	2	14.72	11.111	0.29183	1	0.46186
Valine, leucine and isoleucine biosynthesis	8	3	14.444	11.111	0.29828	1	0.46186
Butanoate metabolism	15	4	13.303	11.111	0.32366	1	0.48026
Pyruvate metabolism	23	3	12.588	11.111	0.34499	1	0.48026
Citrate cycle (TCA cycle)	20	6	12.325	11.111	0.34724	1	0.48026
Ascorbate and aldarate metabolism	9	1	10.534	11.111	0.3602	1	0.48026
Inositol phosphate metabolism	30	1	10.534	11.111	0.3602	1	0.48026
Amino sugar and nucleotide sugar metabolism	42	2	12.106	11.111	0.37438	1	0.48078
Taurine and hypotaurine metabolism	8	1	9.7161	11.111	0.38062	1	0.48078
Cysteine and methionine metabolism	33	2	11.291	11.111	0.40738	1	0.50008
Steroid hormone biosynthesis	87	3	11.454	11.111	0.42472	1	0.50008
alpha-Linolenic acid metabolism	13	1	7.2525	11.111	0.45179	1	0.50008
Starch and sucrose metabolism	18	3	9.8258	11.111	0.45749	1	0.50008
Linoleic acid metabolism	5	1	6.7912	11.111	0.4671	1	0.50008
Histidine metabolism	16	1	6.7406	11.111	0.46882	1	0.50008
Nicotinate and nicotinamide metabolism	15	1	6.7406	11.111	0.46882	1	0.50008
Sulfur metabolism	8	1	6.0712	11.111	0.49255	1	0.51397
Galactose metabolism	27	6	8.6235	11.111	0.54037	1	0.54115
Pantothenate and CoA biosynthesis	20	4	8.2074	11.111	0.54115	1	0.54115

## Sheet: Table S5 (Urea)
Table S5. Pathways regulated under urea in the shoot tissues of two genotypes (XZ16, Hua30) through KEGG pathway analysis.
Pathway Name	Total Cmpd	Hits	Statistic Q	Expected Q	Raw p-value	Holm p	FDR
Arginine biosynthesis	14	5	66.015	11.111	5.8361e-06	0.00028013	0.00028013
Pyrimidine metabolism	39	4	58.025	11.111	2.069e-05	0.00097244	0.00047256
alpha-Linolenic acid metabolism	13	1	89.912	11.111	2.9535e-05	0.0013586	0.00047256
Alanine, aspartate and glutamate metabolism	28	10	47.47	11.111	6.0801e-05	0.002736	0.00072961
Glycolysis / Gluconeogenesis	26	3	46.321	11.111	9.352e-05	0.0041149	0.00087641
Linoleic acid metabolism	5	1	86.061	11.111	0.00010955	0.0047107	0.00087641
Glutathione metabolism	28	2	70.428	11.111	0.00013954	0.0058607	0.00095685
beta-Alanine metabolism	21	5	43.813	11.111	0.0003469	0.014223	0.0020814
Glycerophospholipid metabolism	36	2	62.428	11.111	0.00048594	0.019438	0.0025917
Arginine and proline metabolism	36	5	41.137	11.111	0.00055096	0.021488	0.0026446
Pantothenate and CoA biosynthesis	20	4	57.029	11.111	0.0007446	0.028295	0.0032492
Purine metabolism	70	4	37.445	11.111	0.00098514	0.03645	0.0039406
Citrate cycle (TCA cycle)	20	6	42.905	11.111	0.0010722	0.038599	0.0039589
Lipoic acid metabolism	28	3	58.912	11.111	0.0015266	0.05343	0.005234
Nitrogen metabolism	6	1	71.666	11.111	0.0020066	0.068224	0.0057901
Lysine degradation	30	1	71.517	11.111	0.0020506	0.068224	0.0057901
Biotin metabolism	10	1	71.517	11.111	0.0020506	0.068224	0.0057901
Butanoate metabolism	15	4	36.467	11.111	0.0038378	0.11897	0.010234
Cysteine and methionine metabolism	33	2	54.142	11.111	0.0077187	0.23156	0.0195
Histidine metabolism	16	1	58.204	11.111	0.010265	0.29768	0.023463
Nicotinate and nicotinamide metabolism	15	1	58.204	11.111	0.010265	0.29768	0.023463
Tyrosine metabolism	42	2	46.627	11.111	0.012361	0.33374	0.026969
Galactose metabolism	27	6	26.267	11.111	0.014836	0.38574	0.030962
Valine, leucine and isoleucine biosynthesis	8	3	42.38	11.111	0.018957	0.47393	0.033446
Pyruvate metabolism	23	3	33.69	11.111	0.01898	0.47393	0.033446
Biosynthesis of unsaturated fatty acids	36	6	33.645	11.111	0.019153	0.47393	0.033446
Pentose phosphate pathway	23	8	25.606	11.111	0.019498	0.47393	0.033446
Propanoate metabolism	21	3	39.932	11.111	0.01951	0.47393	0.033446
Valine, leucine and isoleucine degradation	39	3	40.978	11.111	0.020687	0.47393	0.034241
Fructose and mannose metabolism	20	4	29.263	11.111	0.021649	0.47393	0.034638
Glyoxylate and dicarboxylate metabolism	31	7	31.173	11.111	0.02372	0.47393	0.036278
Sulfur metabolism	8	1	49.01	11.111	0.024186	0.47393	0.036278
Glycine, serine and threonine metabolism	33	4	29.73	11.111	0.025841	0.47393	0.037587
Steroid hormone biosynthesis	87	3	27.488	11.111	0.044146	0.66219	0.060262
Fatty acid biosynthesis	47	2	29.85	11.111	0.044956	0.66219	0.060262
Primary bile acid biosynthesis	46	1	40.904	11.111	0.046452	0.66219	0.060262
Porphyrin metabolism	31	1	40.904	11.111	0.046452	0.66219	0.060262
Ubiquinone and other terpenoid-quinone biosynthesis	18	1	37.359	11.111	0.060456	0.66501	0.076365
Glycerolipid metabolism	16	3	27.181	11.111	0.062856	0.66501	0.077361
Starch and sucrose metabolism	18	3	22.341	11.111	0.079604	0.71644	0.095525
Amino sugar and nucleotide sugar metabolism	42	2	24.432	11.111	0.095678	0.76542	0.11201
Taurine and hypotaurine metabolism	8	1	16.269	11.111	0.24776	1	0.28315
D-Amino acid metabolism	15	1	15.201	11.111	0.26538	1	0.29624
Fatty acid elongation	38	1	12.329	11.111	0.31982	1	0.33316
Fatty acid degradation	39	1	12.329	11.111	0.31982	1	0.33316
Ascorbate and aldarate metabolism	9	1	12.027	11.111	0.32622	1	0.33316
Inositol phosphate metabolism	30	1	12.027	11.111	0.32622	1	0.33316
Riboflavin metabolism	4	1	7.4357	11.111	0.44591	1	0.44591

## Sheet: Table S6 (Glycine)
Table S6. Pathways regulated under glycine regulated in the shoot tissues of two genotypes (XZ16, Hua30) through KEGG pathway analysis.
Pathway Name	Total Cmpd	Hits	Statistic Q	Expected Q	Raw p-value	Holm p	FDR
Glyoxylate and dicarboxylate metabolism	31	7	43.417	11.111	7.4129e-05	0.0035582	0.0035582
Pentose phosphate pathway	23	8	33.737	11.111	0.00060631	0.028496	0.013175
Lipoic acid metabolism	28	3	48.608	11.111	0.0010269	0.047239	0.013175
Glycine, serine and threonine metabolism	33	4	39.422	11.111	0.0013512	0.060806	0.013175
Alanine, aspartate and glutamate metabolism	28	10	28.981	11.111	0.0013723	0.060806	0.013175
Glycolysis / Gluconeogenesis	26	3	37.699	11.111	0.0040343	0.17348	0.032275
Nitrogen metabolism	6	1	60.282	11.111	0.0082642	0.3471	0.056669
Citrate cycle (TCA cycle)	20	6	28.2	11.111	0.0098959	0.40573	0.059375
Arginine biosynthesis	14	5	34.683	11.111	0.01338	0.53522	0.063698
Glycerolipid metabolism	16	3	36.01	11.111	0.01456	0.56784	0.063698
Fructose and mannose metabolism	20	4	25.411	11.111	0.014598	0.56784	0.063698
Butanoate metabolism	15	4	27.243	11.111	0.017862	0.66091	0.071449
Pantothenate and CoA biosynthesis	20	4	27.551	11.111	0.024408	0.8787	0.090123
Pyrimidine metabolism	39	4	25.225	11.111	0.034659	1	0.11883
Lysine degradation	30	1	40.063	11.111	0.049502	1	0.1379
Biotin metabolism	10	1	40.063	11.111	0.049502	1	0.1379
Primary bile acid biosynthesis	46	1	39.22	11.111	0.052721	1	0.1379
Porphyrin metabolism	31	1	39.22	11.111	0.052721	1	0.1379
Valine, leucine and isoleucine degradation	39	3	27.787	11.111	0.055062	1	0.1379
Purine metabolism	70	4	24.405	11.111	0.057458	1	0.1379
Valine, leucine and isoleucine biosynthesis	8	3	25.618	11.111	0.061939	1	0.13979
beta-Alanine metabolism	21	5	21.161	11.111	0.06407	1	0.13979
alpha-Linolenic acid metabolism	13	1	34.761	11.111	0.072836	1	0.14587
D-Amino acid metabolism	15	1	34.742	11.111	0.072936	1	0.14587
Amino sugar and nucleotide sugar metabolism	42	2	26.569	11.111	0.077509	1	0.14882
Propanoate metabolism	21	3	20.659	11.111	0.10516	1	0.19413
Starch and sucrose metabolism	18	3	21.624	11.111	0.11266	1	0.20028
Tyrosine metabolism	42	2	23.007	11.111	0.12269	1	0.21033
Histidine metabolism	16	1	25.127	11.111	0.13994	1	0.22391
Nicotinate and nicotinamide metabolism	15	1	25.127	11.111	0.13994	1	0.22391
Cysteine and methionine metabolism	33	2	20.666	11.111	0.15455	1	0.2336
Ubiquinone and other terpenoid-quinone biosynthesis	18	1	23.211	11.111	0.15854	1	0.2336
Glutathione metabolism	28	2	20.346	11.111	0.1606	1	0.2336
Linoleic acid metabolism	5	1	18.006	11.111	0.22162	1	0.31287
Pyruvate metabolism	23	3	15.344	11.111	0.26642	1	0.36538
Glycerophospholipid metabolism	36	2	14.483	11.111	0.30054	1	0.40071
Taurine and hypotaurine metabolism	8	1	12.535	11.111	0.31552	1	0.40932
Biosynthesis of unsaturated fatty acids	36	6	12.527	11.111	0.34802	1	0.4396
Arginine and proline metabolism	36	5	11.874	11.111	0.38559	1	0.47457
Steroid hormone biosynthesis	87	3	10.019	11.111	0.46268	1	0.53668
Galactose metabolism	27	6	10.34	11.111	0.46491	1	0.53668
Riboflavin metabolism	4	1	6.6444	11.111	0.47213	1	0.53668
Fatty acid biosynthesis	47	2	9.3858	11.111	0.48077	1	0.53668
Ascorbate and aldarate metabolism	9	1	4.1587	11.111	0.572	1	0.61013
Inositol phosphate metabolism	30	1	4.1587	11.111	0.572	1	0.61013
Sulfur metabolism	8	1	3.3805	11.111	0.61113	1	0.61835
Fatty acid elongation	38	1	3.2475	11.111	0.61835	1	0.61835
Fatty acid degradation	39	1	3.2475	11.111	0.61835	1	0.61835
